# Supplementary material for: CETP (Cholesteryl Ester Transfer Protein) Inhibition With Anacetrapib Decreases Production of Lipoprotein(a) in Mildly Hypercholesterolemic Subjects
Source: PubMed Central journal article supplement (PMC5567403; doi:10.1161/atvbaha.117.309549), 2017-08-23
Supplement: atv-37-1770-s002.pdf [file atv-37-1770-s002.pdf]

**Supplemental Table I. Full cohort Lp(a) levels and isoform size (N=39)****Plasma Lp(a) levels (nmol/L)**

| Study Arm | Subject Number | Period 1 | Period 2 | apo(a) isoforms<br>(number of Kringle 4 domains) |   |    |
|-----------|----------------|----------|----------|--------------------------------------------------|---|----|
|           |                |          |          |                                                  |   |    |
| S-ANA     | 1              | 134.4    | 96.7     | 19                                               | / | 20 |
| S-ANA     | 2              | 199.7    | 123.4    | 18                                               | / | 25 |
| S-ANA     | 3              | 42.0     | 13.2     | 28                                               | / | 31 |
| S-ANA     | 4              | 211.5    | 205.9    | 17                                               | / | 31 |
| S-ANA     | 5              | 164.4    | 83.4     | 24                                               | / | 27 |
| S-ANA     | 6              | 34.8     | 15.8     | 26                                               | / | 30 |
| S-ANA     | 7              | 0.2      | 0.2      | 28                                               | / | -  |
| S-ANA     | 8              | 236.3    | 223.8    | 17                                               | / | 23 |
| S-ANA     | 9**            | 20.6     | 6.7      | 23                                               | / | 25 |
| S-ANA     | 10             | 20.4     | 14.0     | 30                                               | / | 35 |
| S-ANA     | 11             | 277.0    | 265.0    | 14                                               | / | 19 |
| S-ANA     | 12             | 29.7     | 16.4     | 21                                               | / | 32 |
| S-ANA     | 13             | 59.6     | 31.3     | 20                                               | / | 22 |
| S-ANA     | 14*            | 21.5     | 16.7     | 28                                               | / | -  |
| S-ANA     | 15             | 133.0    | 128.0    | 22                                               | / | 19 |
| S-ANA     | 16             | 1.4      | 0.2      | 32                                               | / | 28 |
| S-ANA     | 17             | 5.3      | 2.7      | 32                                               | / | 34 |
| S-ANA     | 18             | 17.9     | 13.3     | 25                                               | / | 36 |
| S-ANA     | 19             | 30.4     | 28.9     | 28                                               | / | 19 |
| S-ANA     | 20             | 7.0      | 5.2      | 20                                               | / | 23 |
| S-ANA     | 21             | 1.3      | 0.7      | 31                                               | / | 33 |
| S-ANA     | 22             | 15.2     | 3.7      | 23                                               | / | 27 |
| S-ANA     | 23             | 43.7     | 37.3     | 25                                               | / | 29 |
| S-ANA     | 24             | 5.2      | 4.3      | 28                                               | / | 30 |
| S-ANA     | 25             | 108.1    | 87.0     | 18                                               | / | 28 |
| S-ANA     | 26             | 209.3    | 180.6    | 16                                               | / | 25 |
| S-ANA     | 27             | 1.0      | 0.3      | 26                                               | / | 31 |
| S-ANA     | 28             | 9.9      | 9.1      | 18                                               | / | 23 |
| S-ANA     | 29             | 17.2     | 9.0      | 19                                               | / | 26 |
| P-ANA     | 30             | 13.6     | 8.8      | 28                                               | / | 34 |
| P-ANA     | 31*            | 22.2     | 16.1     | 13                                               | / | 28 |
| P-ANA     | 32             | 1.2      | 0.7      | 32                                               | / | 34 |
| P-ANA     | 33             | 68.8     | 47.8     | 23                                               | / | 28 |
| P-ANA     | 34             | 46.2     | 26.2     | 29                                               | / | 26 |
| P-ANA     | 35             | 0.9      | 0.1      | 28                                               | / | 30 |
| P-ANA     | 36             | 20.1     | 24.8     | 27                                               | / | 29 |
| P-ANA     | 37             | 10.5     | 8.4      | 19                                               | / | 28 |
| P-ANA     | 38             | 11.9     | 6.8      | 18                                               | / | 31 |
| P-ANA     | 39             | 123.4    | 106.9    | -                                                | / | -  |

S-ANA: Atorvastatin-Anacetrapib Arm, P-ANA: Placebo-Anacetrapib Arm

\*Met inclusion criteria but did not have adequate sample volumes remaining after completion of prior (main) studies.

\*\*Met baseline inclusion criteria but post treatment Lp(a) levels were below the sensitivity of the LC/MS method.

**Supplemental Table II.** Individual Subject apo(a) concentrations, fractional clearance rates and production rates.

|       | Subject Number | Pool Size | Pool Size | FCR      | FCR      | PR        | PR        | % Δ    | % Δ  | % Δ  |
|-------|----------------|-----------|-----------|----------|----------|-----------|-----------|--------|------|------|
|       |                | apo(a)    | apo(a)    |          |          |           |           | apo(a) | FCR  | PR   |
|       |                | nM        | nM        | pools/d  | pools/d  | nmol/kg/d | nmol/kg/d |        |      |      |
|       | Period 1       | Period 2  | Period 1  | Period 2 | Period 1 | Period 2  |           |        |      |      |
| S-ANA | 1              | 134.40    | 96.70     | 0.179    | 0.159    | 1.084     | 0.691     | -28%   | -11% | -36% |
| S-ANA | 2*             | 199.70    | 123.40    | 0.155    | 0.253    | 1.397     | 1.403     | -38%   | 63%  | 0%   |
| S-ANA | 3              | 42.00     | 13.20     | 0.344    | 0.386    | 0.650     | 0.229     | -69%   | 12%  | -65% |
| S-ANA | 5*             | 164.40    | 83.40     | 0.143    | 0.372    | 1.054     | 1.398     | -49%   | 161% | 33%  |
| S-ANA | 6              | 34.80     | 15.80     | 0.316    | 0.475    | 0.495     | 0.338     | -55%   | 50%  | -32% |
| S-ANA | 10             | 20.40     | 14.00     | 0.413    | 0.459    | 0.380     | 0.289     | -31%   | 11%  | -24% |
| S-ANA | 12             | 29.70     | 16.40     | 0.385    | 0.378    | 0.514     | 0.279     | -45%   | -2%  | -46% |
| S-ANA | 13             | 59.60     | 31.30     | 0.389    | 0.417    | 1.042     | 0.588     | -47%   | 7%   | -44% |
| S-ANA | 23             | 43.70     | 37.30     | 0.299    | 0.159    | 0.588     | 0.267     | -15%   | -47% | -55% |
| S-ANA | 25             | 108.10    | 87.00     | 0.086    | 0.075    | 0.420     | 0.293     | -20%   | -13% | -30% |
| P-ANA | 33             | 68.80     | 47.80     | 0.346    | 0.259    | 1.072     | 0.557     | -31%   | -25% | -48% |
| P-ANA | 34             | 46.20     | 26.20     | 0.305    | 0.294    | 0.634     | 0.346     | -43%   | -4%  | -45% |

\*Data from the two subjects who had no change or increase in PR.
